# Supplementary material
Source: publisher figshare collection journal article supplement (https://acs.figshare.com/ndownloader/files/4063564)
Supplement: Supplementary file 1 [file 4063564]

## Supporting Information

# Multimodal *In Vivo* Imaging Exposes the Voyage of Nanoparticles in Tumor Microcirculation

Randall Toy<sup>1,2,3</sup>, Elliott Hayden<sup>1,3</sup>, Andrew Camann<sup>1,3</sup>, Zachary Berman<sup>2,3</sup>, Peter Vicente<sup>1,3</sup>, Emily Tran<sup>1,3</sup>, Joseph Meyers<sup>1,3</sup>, Jenna Pansky<sup>1,3</sup>, Pubudu M. Peiris<sup>1,3</sup>, Hanping Wu<sup>2,3</sup>, Agata Exner<sup>1,2,3,4</sup>, David Wilson<sup>1,2,3,4</sup>, Ketan B. Ghaghada<sup>5,6</sup>, and Efstathios Karathanasis<sup>1,2,3,4,\*</sup>

<sup>1</sup>Department of Biomedical Engineering, Case Western Reserve University, Cleveland, Ohio

<sup>2</sup>Department of Radiology, Case Western Reserve University, Cleveland, Ohio

<sup>3</sup>Case Center for Imaging Research, Case Western Reserve University, Cleveland, Ohio

<sup>4</sup>Case Comprehensive Cancer Center, Case Western Reserve University, Cleveland, Ohio

<sup>5</sup>Edward B. Singleton Department of Pediatric Radiology, Texas Children's Hospital, Houston, Texas

<sup>6</sup>Department of Radiology, Baylor College of Medicine, Houston, Texas

\* Author to whom correspondence should be addressed: Efstathios Karathanasis

email: [stathis@case.edu](mailto:stathis@case.edu)

### Supporting Figures

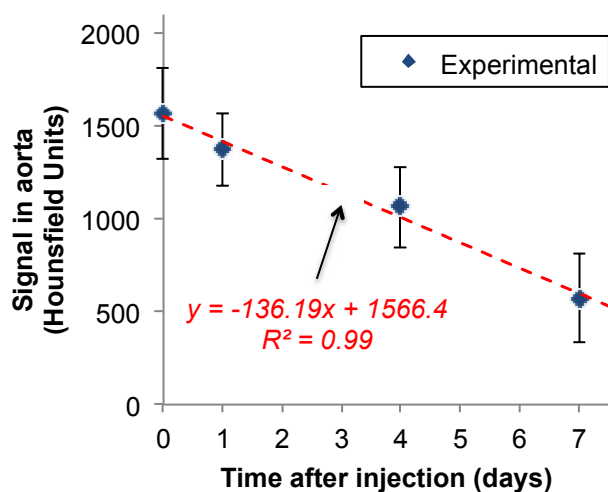

**Supporting Figure S1.** Blood clearance of the 100-nm liposomal contrast agent in rats with orthotopic 13762 MAT B III tumors. The time–attenuation curve in the aorta was measured at multiple time points using a micro-CT system after systemic administration of the liposomal contrast agent encapsulating 110 mg/mL iodine (dose: 2.25 g/kg iodine; n=3 animals). Signal is shown in Hounsfield Units (HU). The pre-injection attenuation in the aorta (t<0) was ~150 HU. Imaging was performed immediately after post-injection (t=0) and 1, 4 and 7 days post-injection.
